# Supplementary material
Source: PubMed Central journal article supplement (PMC4715581)
Supplement: NIHMS721637-supplement-Supp_TableS1-S2.pdf [file NIHMS721637-supplement-Supp_TableS1-S2.pdf]

**Table S1. Temporal course for LV capillary and myocardial remodeling during CH-PH.**

|                                         | <b>Exp.</b> | <b>7 days</b> | <b>21 days</b> | <b>ANOVA</b>    |
|-----------------------------------------|-------------|---------------|----------------|-----------------|
| <b>L<sub>cap</sub> (cm)</b>             | Norm        | 33602±4703    | 37675±4856     | <i>P</i> = 0.60 |
|                                         | CH          | 38766±4921    | 45048±3719     |                 |
| <b>S<sub>cap</sub> (cm<sup>2</sup>)</b> | Norm        | 29.0±8.8      | 41.5±8.0       | <i>P</i> = 0.79 |
|                                         | CH          | 30.7±4.9      | 41.6±2.3       |                 |
| <b>V<sub>cap</sub> (cm<sup>3</sup>)</b> | Norm        | 0.0047±0.0015 | 0.0063±0.0015  | <i>P</i> = 0.73 |
|                                         | CH          | 0.0055±0.0012 | 0.0067±0.0006  |                 |
| <b>V<sub>myo</sub> (cm<sup>3</sup>)</b> | Norm        | 0.068±0.007   | 0.073±0.006    | <i>P</i> = 0.79 |
|                                         | CH          | 0.061±0.004   | 0.067±0.003    |                 |
| <b>V<sub>LV</sub> (cm<sup>3</sup>)</b>  | Norm        | 0.083±0.011   | 0.089±0.009    | <i>P</i> = 0.92 |
|                                         | CH          | 0.078±0.006   | 0.085±0.004    |                 |

Data are reported as mean ± standard deviation for 5 animals per group. *P*-values are for 2-way ANOVA, comparing effects of hypoxia and time on each parameter. L<sub>cap</sub> = total capillary length; S<sub>cap</sub> = total capillary surface area; V<sub>cap</sub> = total capillary lumen volume; V<sub>myo</sub> = total myocyte volume; V<sub>LV</sub> = total LV volume.

**Table S2. LV hypoxia gene expression profile.**

| CH Time | Gene Symbol           | Gene Name                                                                    | Genbank             | Fold Regulation | P-value      |
|---------|-----------------------|------------------------------------------------------------------------------|---------------------|-----------------|--------------|
| 7 days  | <i>Eif4ebp1</i>       | Eukaryotic translation initiation factor 4E binding protein 1                | NM_007918           | -2.00           | 0.041        |
|         | <i>Plau</i>           | Plasminogen activator, urokinase                                             | NM_008873           | -1.50           | 0.042        |
| 21 days | <b><i>Ankrd37</i></b> | <b>Ankyrin repeat domain 37</b>                                              | <b>NM_001039562</b> | <b>3.28</b>     | <b>0.001</b> |
|         | <i>Anxa2</i>          | Annexin A2                                                                   | NM_007585           | 1.95            | 0.006        |
|         | <i>Bhlhe40</i>        | Basic helix-loop-helix family, member e40                                    | NM_011498           | 2.71            | 0.005        |
|         | <i>Bnip3</i>          | BCL2/adenovirus E1B interacting protein 3                                    | NM_009760           | 2.19            | 0.030        |
|         | <i>Btg1</i>           | B-cell translocation gene 1, anti-proliferative                              | NM_007569           | 1.71            | 0.011        |
|         | <i>Egln1</i>          | EGL nine homolog 1 (C. elegans)                                              | NM_053207           | 1.73            | 0.044        |
|         | <b><i>F3</i></b>      | <b>Coagulation factor III</b>                                                | <b>NM_010171</b>    | <b>1.65</b>     | <b>0.005</b> |
|         | <b><i>Hmox1</i></b>   | <b>Heme oxygenase (decycling) 1</b>                                          | <b>NM_010442</b>    | <b>2.80</b>     | <b>0.003</b> |
|         | <i>Lgals3</i>         | Lectin, galactose binding, soluble 3                                         | NM_010705           | 2.89            | 0.012        |
|         | <i>Lox</i>            | Lysyl oxidase                                                                | NM_010728           | 1.78            | 0.018        |
|         | <i>Ndrp1</i>          | N-myc downstream regulated gene 1                                            | NM_008681           | 1.55            | 0.002        |
|         | <i>Per1</i>           | Period homolog 1 (Drosophila)                                                | NM_011065           | 2.64            | 0.031        |
|         | <i>Pfkp</i>           | Phosphofructokinase, platelet                                                | NM_019703           | 1.50            | 0.006        |
|         | <i>Pkm</i>            | Pyruvate kinase, muscle                                                      | NM_011099           | 1.90            | 0.014        |
|         | <b><i>Slc16a3</i></b> | <b>Solute carrier family 16 (monocarboxylic acid transporters), member 3</b> | <b>NM_030696</b>    | <b>2.51</b>     | <b>0.011</b> |
|         | <i>Slc2a1</i>         | Solute carrier family 2 (facilitated glucose transporter), member 1          | NM_011400           | 2.10            | 0.003        |
